# Supplementary material for: A new strategy for structuring white organic light-emitting diodes by combining complementary emissions in the same interface
Source: Royal Society of Chemistry journal article supplement (doi:10.1039/c9tc06198c), 2020-01-01
Supplement: c9tc06198c1.pdf [file c9tc06198c1.pdf]

## Supporting information

### **A new strategy for structuring white organic light-emitting diodes by combining complementary emissions in the same interface**

Xiaozhen Wei <sup>a,1</sup>, Long Gao<sup>b,1</sup>, Yanqin Miao<sup>a,\*</sup>, Yaping Zhao<sup>a</sup>, Mengna Yin<sup>a</sup>, Hua Wang <sup>a</sup>,  
Bingshe Xu <sup>a</sup>

<sup>a</sup>*Key Laboratory of Interface Science and Engineering in Advanced Materials of Ministry of Education, Taiyuan University of Technology, Taiyuan, 030024, China*

<sup>b</sup>*School of Materials Science and Engineering, Jilin University, Changchun, 130022, China*

<sup>1</sup> Xiaozhen Wei and Long Gao contributed equally to this work.

E-mail: miaoyanqin@tyut.edu.cn (Yanqin Miao)

#### **Section S1**

ITO glass substrates were scrubbed and sonicated consecutively with detergent water, deionized water, and acetone, dried in drying cabinet, and then exposed to a UV ozone

environment for 10 min. After these processes, the cleaned ITO glass substrates were loaded in a vacuum chamber, a base pressure of  $\leq 5 \times 10^{-4}$  Pa, for film deposition using thermal evaporation technology. The deposition rate and film thickness were monitored controlled by the calibrated crystal quartz sensors, e.g., the deposition rates of organic materials, MoO<sub>3</sub>, LiF, and cathode Al were controlled at about 1 Å/s, 0.3 Å/s, 0.1 Å/s, and 3–6 Å/s, respectively. The array arrangements for different exciplex acceptor layers on the same exciplex donor layer are realized by switching mask technology under a high vacuum environment. Specifically, in this work, exciplex acceptor material TPBi is firstly deposited on the part surface of exciplex donor (TAPC) layer by controlling a pattern mask, and then, by switching pattern mask, another exciplex acceptor material PO-T2T is further deposited on the remaining surface of the same exciplex donor (TAPC) layer, on which there is no covering TPBi film. The TPBi and PO-T2T layers, with the same thickness, forming the seamless dense arrangement on the same exciplex donor (TAPC) layer. Organic films for PL measurements were fabricated with the same method as device fabrication. The EL spectra, CRI, CCT, and CIE coordinates of all OLEDs were measured by a computer controlled PR-655 spectra scan spectrometer. The current density-voltage-luminance characteristics, and current efficiency, and power efficiency were recorded by a computer-controlled Keithley 2400 source integrated with a BM-70A luminance meter. The external quantum efficiency was calculated from the current density-voltage-luminance curve and spectra data.

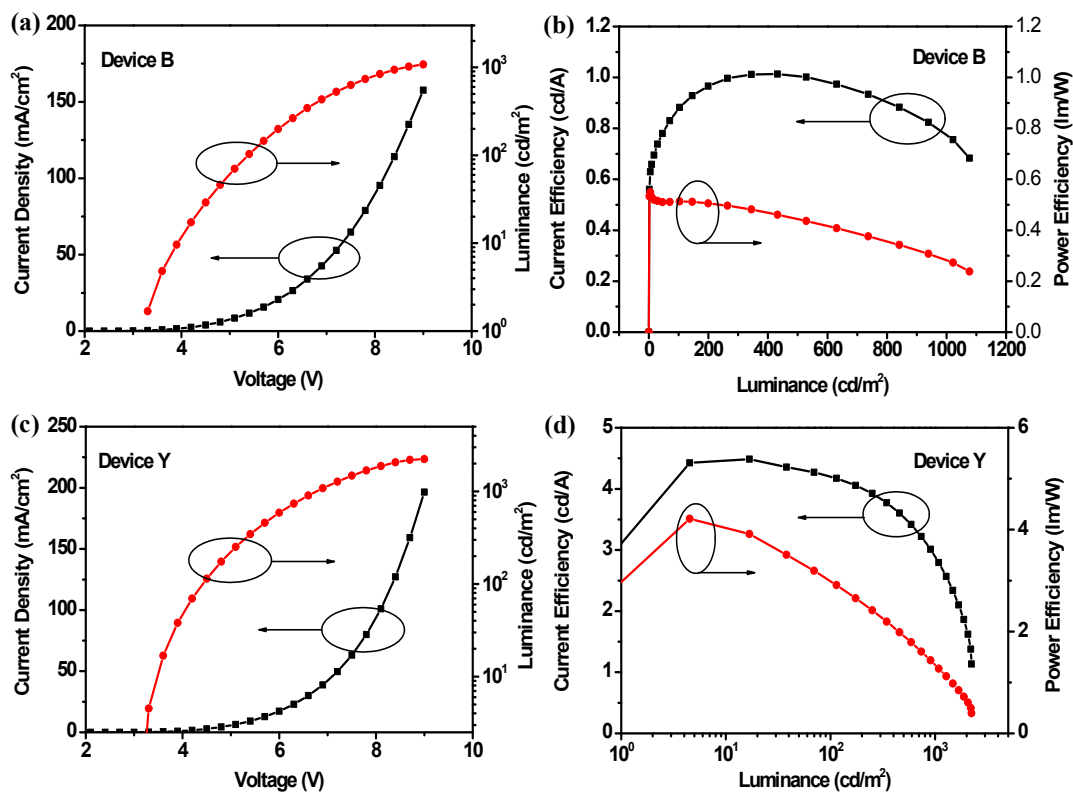

**Figure S1** The current density-voltage-luminance characteristics curves (a and c), and current efficiency-luminance -power efficiency characteristics curves (b and d) for exciplex-based blue and yellow devices B and Y.
